# Supplementary material for: Prediction of pharmacological activities from chemical structures with graph convolutional neural networks
Source: PubMed Central journal article supplement (PMC7803991; doi:10.1038/s41598-020-80113-7), 2021-01-12
Supplement: 41598_2020_80113_MOESM1_ESM.pdf [file 41598_2020_80113_MOESM1_ESM.pdf]

## Supplementary Information

Prediction of pharmacological activities from chemical structures with graph convolutional neural networks

Miyuki Sakai, Kazuki Nagayasu, Norihiro Shibui, Chihiro Andoh, Kaito Takayama, Hisashi Shirakawa and Shuji Kaneko

Supplementary Figure S1, S2

Supplementary Table S1-S5

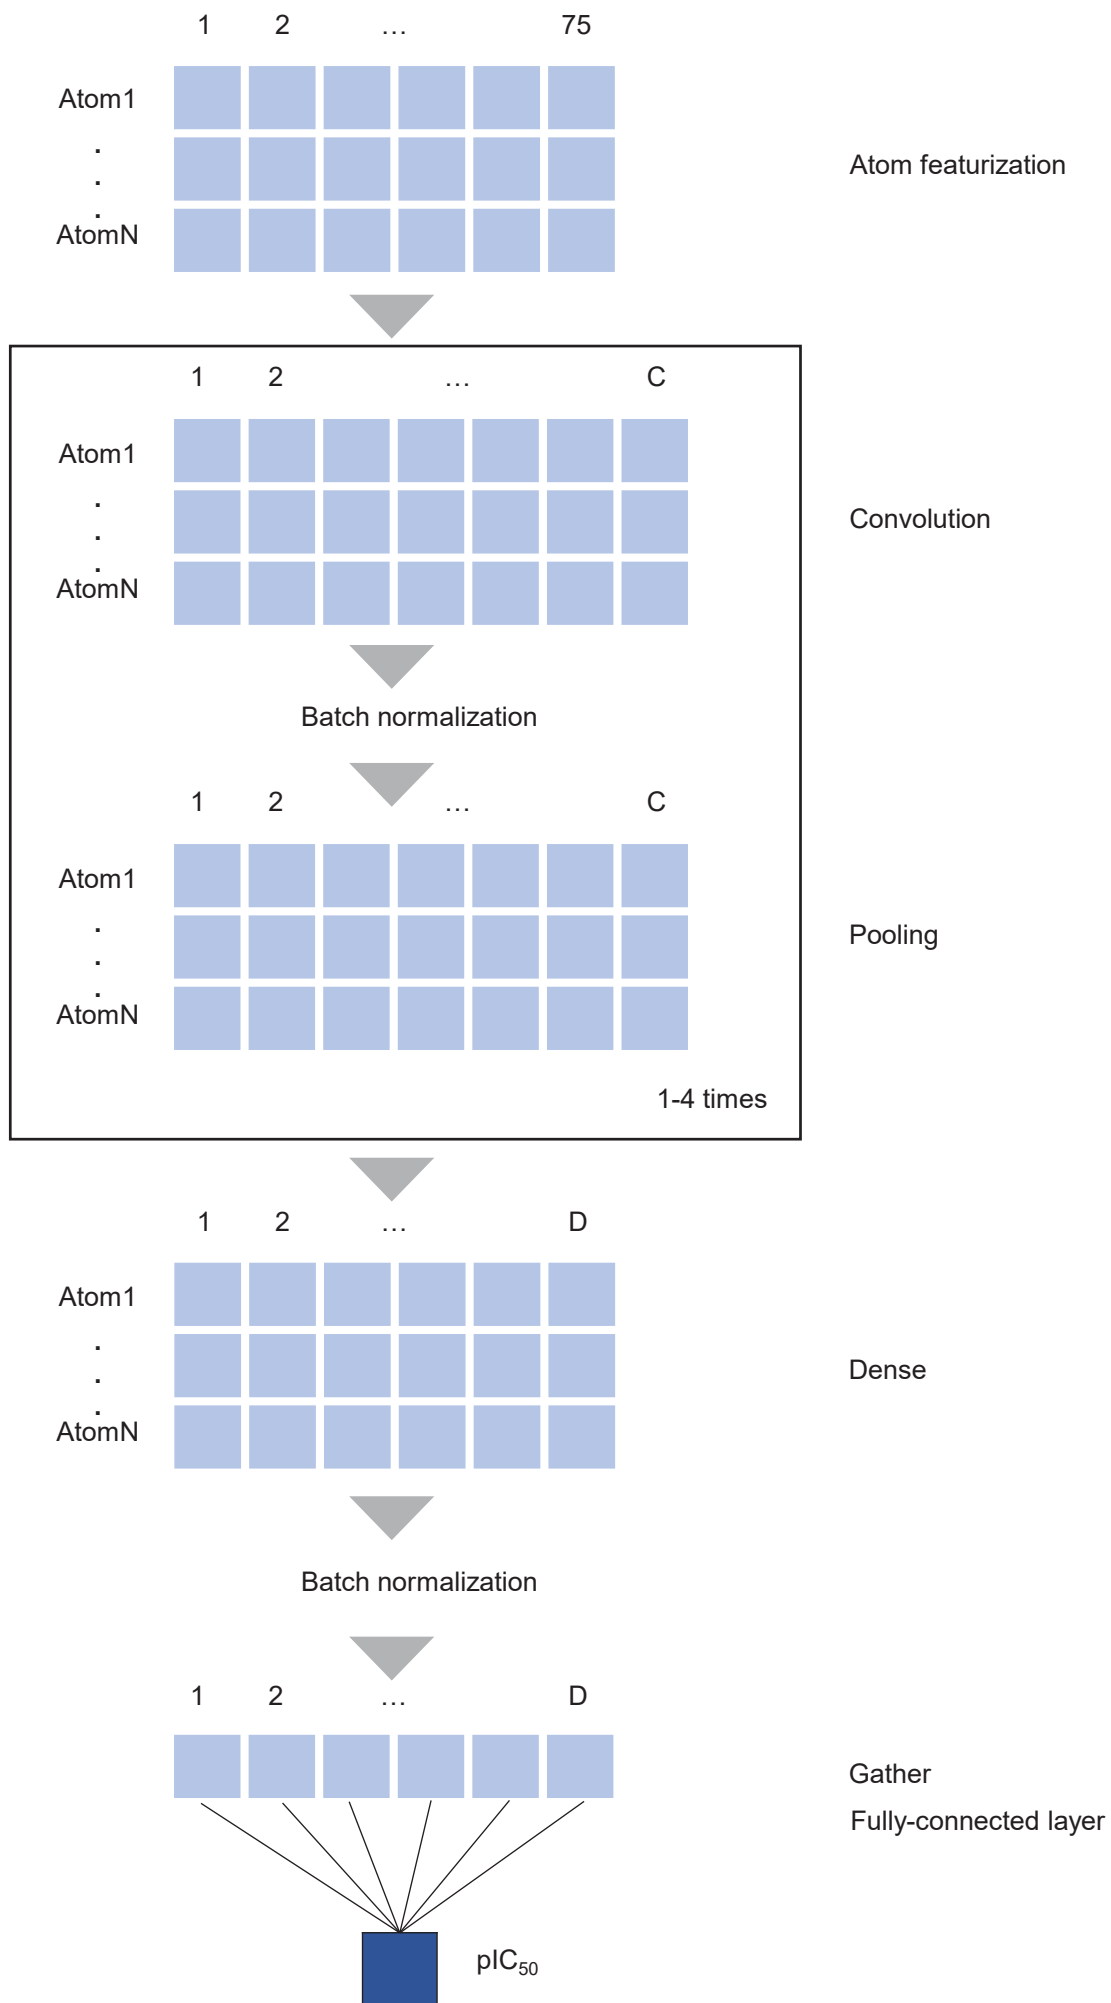

Figure S1. Schematic of graph convolutional neural network architecture

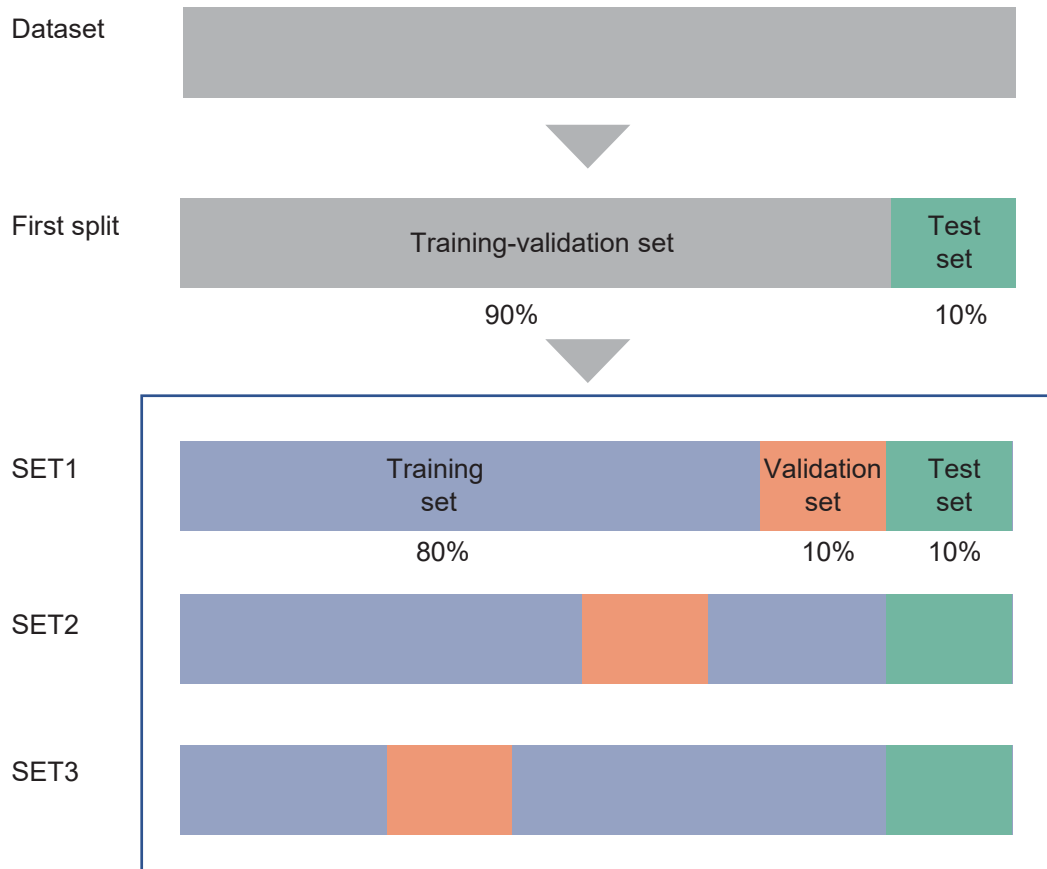

Figure S2. Data splitting

Table S1. Atom features

| Feature           | Description                                                                                            | Size |
|-------------------|--------------------------------------------------------------------------------------------------------|------|
| atom type         | type of atom (e.g., C, N, O, S) and "Unknown" (one-hot)                                                | 44   |
| degree            | number of bonds the atom is connected to (one-hot)                                                     | 11   |
| valence           | number of implicit valence (one-hot)                                                                   | 7    |
| formal charge     | integer electronic charge                                                                              | 1    |
| radical electrons | number of radical electrons                                                                            | 1    |
| hybridization     | sp, sp <sup>2</sup> , sp <sup>3</sup> , sp <sup>3</sup> d, or sp <sup>3</sup> d <sup>2</sup> (one-hot) | 5    |
| aromaticity       | whether the atom is part of an aromatic system                                                         | 1    |
| hydrogens         | number of bonded hydrogen atoms (one-hot)                                                              | 5    |

Table S2. Protein families and targets

| Protein family                    | Number of targets <sup>a</sup> | Number of targets <sup>b</sup> |
|-----------------------------------|--------------------------------|--------------------------------|
| G protein-coupled receptor (GPCR) | 33                             | 0                              |
| Enzyme <sup>c</sup>               | 28                             | 0                              |
| Kinase                            | 24                             | 0                              |
| Protease                          | 15                             | 0                              |
| Ion channel                       | 7                              | 3                              |
| Nuclear receptor                  | 5                              | 2                              |
| Transporter                       | 3                              | 2                              |
| Others                            | 5                              | 0                              |

a: The number of targets containing compounds equal to or greater than 1,000

b: The number of targets containing compounds fewer than 1,000

c: In the classification of ChEMBL, "kinase" and "protease" belong to the subcategory of "enzyme", however, these two classes are counted separately, and "enzyme" in this report does not include "kinase" nor "protease".

Table S3. All targets studied and their details

|    | Protein family | Target <sup>a</sup>                                              | Number of compounds | Scaffold diversity (H) | Number of convolutional layers | Size: convolutional layer | Size: dense layer | MAE: ensemble | R <sup>2</sup> : ensemble | MAE: individual model <sup>c</sup> | R <sup>2</sup> : individual model <sup>c</sup> |
|----|----------------|------------------------------------------------------------------|---------------------|------------------------|--------------------------------|---------------------------|-------------------|---------------|---------------------------|------------------------------------|------------------------------------------------|
| 1  | GPCR           | Orexin receptor                                                  | 2,852               | 3.13                   | 1-2                            | 52 - 1,489                | 688 - 2,028       | 0.36          | 0.79                      | 0.41 ± 0.013                       | 0.77 ± 0.013                                   |
| 2  | GPCR           | Serotonin 7 (5-HT7) receptor                                     | 2,395               | 3.36                   | 1-2                            | 99 - 1,978                | 420 - 2,031       | 0.42          | 0.74                      | 0.47 ± 0.023                       | 0.70 ± 0.026                                   |
| 3  | GPCR           | Orexin receptor 2                                                | 3,079               | 3.11                   | 1-2                            | 248 - 1,708               | 621 - 2,026       | 0.45          | 0.71                      | 0.50 ± 0.010                       | 0.68 ± 0.015                                   |
| 4  | GPCR           | Cannabinoid CB1 receptor                                         | 6,966               | 2.90                   | 1-2                            | 99 - 1,460                | 979 - 2,031       | 0.46          | 0.76                      | 0.51 ± 0.0080                      | 0.72 ± 0.0076                                  |
| 5  | GPCR           | G protein-coupled receptor 44                                    | 2,655               | 2.52                   | 1-2                            | 64 - 1,238                | 740 - 1,889       | 0.47          | 0.65                      | 0.52 ± 0.037                       | 0.59 ± 0.040                                   |
| 6  | GPCR           | Dopamine D1 receptor                                             | 2,774               | 2.82                   | 1-2                            | 232 - 1,014               | 999 - 2,041       | 0.47          | 0.71                      | 0.52 ± 0.021                       | 0.69 ± 0.013                                   |
| 7  | GPCR           | Melanin-concentrating hormone receptor 1                         | 3,124               | 3.48                   | 1-2                            | 97 - 1,909                | 896 - 2,038       | 0.47          | 0.60                      | 0.52 ± 0.0078                      | 0.54 ± 0.011                                   |
| 8  | GPCR           | Serotonin 6 (5-HT6) receptor                                     | 3,106               | 2.78                   | 1-2                            | 50 - 2,027                | 227 - 2,045       | 0.47          | 0.72                      | 0.53 ± 0.018                       | 0.67 ± 0.019                                   |
| 9  | GPCR           | Corticotropin releasing factor receptor 1                        | 2,471               | 1.87                   | 1-2                            | 295 - 1,561               | 829 - 1,998       | 0.48          | 0.63                      | 0.52 ± 0.020                       | 0.59 ± 0.025                                   |
| 10 | GPCR           | Adenosine A2a receptor                                           | 6,206               | 2.91                   | 1-2                            | 317 - 1,862               | 788 - 1,974       | 0.49          | 0.69                      | 0.55 ± 0.019                       | 0.64 ± 0.023                                   |
| 11 | GPCR           | Histamine H3 receptor                                            | 4,021               | 2.88                   | 1-2                            | 114 - 1,245               | 964 - 1,977       | 0.50          | 0.65                      | 0.55 ± 0.012                       | 0.60 ± 0.016                                   |
| 12 | GPCR           | Dopamine D2 receptor                                             | 11,632              | 3.35                   | 1-2                            | 129 - 1,148               | 1,038 - 1,929     | 0.50          | 0.67                      | 0.55 ± 0.0082                      | 0.62 ± 0.0085                                  |
| 13 | GPCR           | Dopamine D3 receptor                                             | 4,983               | 3.45                   | 1-2                            | 206 - 1,982               | 1,297 - 1,943     | 0.50          | 0.72                      | 0.55 ± 0.018                       | 0.68 ± 0.019                                   |
| 14 | GPCR           | Serotonin 2a (5-HT2a) receptor                                   | 6,189               | 3.25                   | 1-2                            | 87 - 1,758                | 882 - 1,992       | 0.51          | 0.69                      | 0.56 ± 0.010                       | 0.65 ± 0.015                                   |
| 15 | GPCR           | Serotonin 2c (5-HT2c) receptor                                   | 3,807               | 2.81                   | 1-2                            | 91 - 1,703                | 558 - 1,994       | 0.51          | 0.72                      | 0.57 ± 0.020                       | 0.67 ± 0.011                                   |
| 16 | GPCR           | Adenosine A3 receptor                                            | 4,502               | 3.00                   | 1-2                            | 99 - 1,279                | 757 - 2,031       | 0.51          | 0.72                      | 0.57 ± 0.018                       | 0.68 ± 0.013                                   |
| 17 | GPCR           | Delta opioid receptor                                            | 6,946               | 3.74                   | 1-2                            | 157 - 1,764               | 411 - 1,911       | 0.52          | 0.78                      | 0.58 ± 0.019                       | 0.73 ± 0.019                                   |
| 18 | GPCR           | Cannabinoid CB2 receptor                                         | 6,413               | 2.71                   | 1-2                            | 150 - 1,577               | 371 - 1,980       | 0.52          | 0.70                      | 0.59 ± 0.022                       | 0.65 ± 0.022                                   |
| 19 | GPCR           | Kappa opioid receptor                                            | 6,645               | 3.60                   | 1-2                            | 211 - 2,044               | 1,166 - 1,953     | 0.52          | 0.75                      | 0.59 ± 0.031                       | 0.70 ± 0.027                                   |
| 20 | GPCR           | Serotonin 1a (5-HT1a) receptor                                   | 8,261               | 3.31                   | 1-2                            | 97 - 1,860                | 697 - 2,021       | 0.52          | 0.69                      | 0.58 ± 0.012                       | 0.64 ± 0.0086                                  |
| 21 | GPCR           | Metabotropic glutamate receptor 5                                | 3,535               | 2.10                   | 1-2                            | 175 - 1,604               | 637 - 1,827       | 0.53          | 0.67                      | 0.57 ± 0.016                       | 0.66 ± 0.020                                   |
| 22 | GPCR           | Adenosine A1 receptor                                            | 7,650               | 2.78                   | 1-2                            | 291 - 2,036               | 1,365 - 2,028     | 0.54          | 0.65                      | 0.59 ± 0.019                       | 0.60 ± 0.022                                   |
| 23 | GPCR           | Cholecystokinin B receptor                                       | 2,459               | 3.74                   | 1-2                            | 163 - 1,253               | 722 - 1,994       | 0.55          | 0.75                      | 0.59 ± 0.021                       | 0.73 ± 0.016                                   |
| 24 | GPCR           | Dopamine D4 receptor                                             | 2,622               | 3.11                   | 1-2                            | 125 - 1,999               | 1,414 - 1,980     | 0.57          | 0.51                      | 0.61 ± 0.027                       | 0.48 ± 0.030                                   |
| 25 | GPCR           | Mu opioid receptor                                               | 8,904               | 3.71                   | 1-2                            | 75 - 1,282                | 897 - 1,808       | 0.58          | 0.73                      | 0.63 ± 0.012                       | 0.70 ± 0.011                                   |
| 26 | GPCR           | Melanocortin receptor 4                                          | 2,902               | 3.72                   | 1-2                            | 107 - 1,917               | 251 - 1,932       | 0.60          | 0.61                      | 0.64 ± 0.026                       | 0.59 ± 0.019                                   |
| 27 | GPCR           | Neurokinin 1 receptor                                            | 2,888               | 3.71                   | 1-2                            | 45 - 963                  | 919 - 2,010       | 0.61          | 0.70                      | 0.65 ± 0.020                       | 0.68 ± 0.016                                   |
| 28 | GPCR           | Endothelin receptor ET-A                                         | 2,486               | 3.58                   | 1-2                            | 274 - 1,979               | 572 - 1,928       | 0.61          | 0.77                      | 0.66 ± 0.022                       | 0.74 ± 0.018                                   |
| 29 | GPCR           | Muscarinic acetylcholine receptor M2                             | 2,135               | 3.22                   | 1-2                            | 45 - 1,457                | 588 - 1,927       | 0.62          | 0.83                      | 0.69 ± 0.076                       | 0.80 ± 0.037                                   |
| 30 | GPCR           | Gonadotropin-releasing hormone receptor                          | 1,726               | 3.72                   | 1-2                            | 256 - 1,486               | 1,065 - 2,006     | 0.62          | 0.94                      | 0.71 ± 0.052                       | 0.91 ± 0.018                                   |
| 31 | GPCR           | Cholecystokinin A receptor                                       | 2,423               | 3.70                   | 1-2                            | 50 - 1,719                | 583 - 1,905       | 0.64          | 0.51                      | 0.68 ± 0.024                       | 0.50 ± 0.018                                   |
| 32 | GPCR           | Muscarinic acetylcholine receptor M1                             | 2,465               | 2.78                   | 1-2                            | 88 - 1,308                | 562 - 2,014       | 0.65          | 0.80                      | 0.71 ± 0.021                       | 0.77 ± 0.030                                   |
| 33 | GPCR           | Alpha-1a adrenergic receptor                                     | 2,193               | 3.43                   | 1-2                            | 108 - 1,061               | 562 - 2,002       | 0.66          | 0.67                      | 0.73 ± 0.023                       | 0.64 ± 0.047                                   |
| 34 | Enzyme         | Acetyl-CoA carboxylase 2                                         | 3,136               | 2.56                   | 1-2                            | 99 - 1,867                | 849 - 2,035       | 0.30          | 0.68                      | 0.33 ± 0.018                       | 0.64 ± 0.032                                   |
| 35 | Enzyme         | Poly [ADP-ribose] polymerase-1                                   | 3,101               | 2.91                   | 1-2                            | 165 - 1,206               | 679 - 2,001       | 0.38          | 0.82                      | 0.42 ± 0.010                       | 0.79 ± 0.011                                   |
| 36 | Enzyme         | Cholinesterase                                                   | 3,011               | 3.50                   | 1-2                            | 222 - 1,843               | 920 - 2,022       | 0.39          | 0.82                      | 0.43 ± 0.015                       | 0.79 ± 0.010                                   |
| 37 | Enzyme         | Nicotinamide phosphoribosyltransferase                           | 2,342               | 3.12                   | 1-2                            | 166 - 1,592               | 679 - 1,945       | 0.41          | 0.68                      | 0.45 ± 0.011                       | 0.63 ± 0.023                                   |
| 38 | Enzyme         | PI3-kinase p110-alpha subunit                                    | 5,699               | 3.38                   | 1-2                            | 161 - 1,725               | 724 - 1,968       | 0.43          | 0.78                      | 0.48 ± 0.012                       | 0.75 ± 0.0074                                  |
| 39 | Enzyme         | 11-beta-hydroxysteroid dehydrogenase 1                           | 3,410               | 2.54                   | 1-2                            | 154 - 1,067               | 862 - 1,917       | 0.43          | 0.79                      | 0.48 ± 0.0076                      | 0.77 ± 0.0068                                  |
| 40 | Enzyme         | Arachidonate 5-lipoxygenase                                      | 2,953               | 2.09                   | 1-2                            | 94 - 1,574                | 649 - 1,837       | 0.45          | 0.64                      | 0.49 ± 0.012                       | 0.59 ± 0.016                                   |
| 41 | Enzyme         | Carbonic anhydrase XII                                           | 2,664               | 1.50                   | 1-2                            | 120 - 1,436               | 817 - 1,904       | 0.46          | 0.69                      | 0.52 ± 0.023                       | 0.65 ± 0.033                                   |
| 42 | Enzyme         | Phosphodiesterase 10A                                            | 4,506               | 3.29                   | 1-2                            | 231 - 1,502               | 854 - 2,033       | 0.49          | 0.75                      | 0.55 ± 0.038                       | 0.69 ± 0.030                                   |
| 43 | Enzyme         | Cyclooxygenase-1                                                 | 4,635               | 1.69                   | 1-2                            | 58 - 1,330                | 553 - 1,897       | 0.49          | 0.47                      | 0.54 ± 0.023                       | 0.45 ± 0.028                                   |
| 44 | Enzyme         | Protein-tyrosine phosphatase 1B                                  | 3,263               | 3.04                   | 1-2                            | 264 - 1,073               | 577 - 1,979       | 0.50          | 0.59                      | 0.55 ± 0.037                       | 0.55 ± 0.039                                   |
| 45 | Enzyme         | Carbonic anhydrase I                                             | 5,305               | 1.71                   | 1-2                            | 366 - 1,904               | 1,150 - 1,814     | 0.50          | 0.74                      | 0.55 ± 0.018                       | 0.70 ± 0.013                                   |
| 46 | Enzyme         | PI3-kinase p110-delta subunit                                    | 2,647               | 3.31                   | 1-2                            | 46 - 1,365                | 640 - 1,991       | 0.50          | 0.71                      | 0.56 ± 0.016                       | 0.69 ± 0.010                                   |
| 47 | Enzyme         | Carbonic anhydrase IX                                            | 3,431               | 1.59                   | 1-2                            | 119 - 1,642               | 781 - 1,966       | 0.50          | 0.70                      | 0.55 ± 0.018                       | 0.67 ± 0.017                                   |
| 48 | Enzyme         | Acetylcholinesterase                                             | 9,737               | 3.26                   | 1-2                            | 103 - 1,299               | 687 - 2,044       | 0.51          | 0.71                      | 0.57 ± 0.019                       | 0.68 ± 0.011                                   |
| 49 | Enzyme         | Integrase                                                        | 2,545               | 2.37                   | 1-2                            | 177 - 1,833               | 756 - 1,742       | 0.51          | 0.82                      | 0.57 ± 0.032                       | 0.79 ± 0.014                                   |
| 50 | Enzyme         | Carbonic anhydrase II                                            | 5,808               | 1.65                   | 1-2                            | 43 - 1,735                | 798 - 1,913       | 0.53          | 0.76                      | 0.62 ± 0.030                       | 0.71 ± 0.024                                   |
| 51 | Enzyme         | Cytochrome P450 19A1                                             | 2,196               | 1.62                   | 1-2                            | 272 - 1,768               | 681 - 1,967       | 0.54          | 0.73                      | 0.58 ± 0.012                       | 0.70 ± 0.011                                   |
| 52 | Enzyme         | Butyrylcholinesterase                                            | 3,451               | 3.25                   | 1-2                            | 67 - 1,645                | 938 - 2,014       | 0.55          | 0.73                      | 0.61 ± 0.023                       | 0.67 ± 0.039                                   |
| 53 | Enzyme         | Human immunodeficiency virus type 1 reverse transcriptase        | 2,310               | 1.70                   | 1-2                            | 179 - 1,433               | 825 - 1,968       | 0.55          | 0.68                      | 0.59 ± 0.018                       | 0.64 ± 0.022                                   |
| 54 | Enzyme         | Protein farnesyltransferase                                      | 2,653               | 3.34                   | 1-2                            | 190 - 1,638               | 333 - 1,947       | 0.56          | 0.77                      | 0.64 ± 0.033                       | 0.72 ± 0.025                                   |
| 55 | Enzyme         | PI3-kinase p110-gamma subunit                                    | 2,596               | 3.23                   | 1-2                            | 165 - 2,019               | 556 - 1,959       | 0.56          | 0.59                      | 0.61 ± 0.019                       | 0.57 ± 0.022                                   |
| 56 | Enzyme         | Monoamine oxidase A                                              | 3,666               | 1.61                   | 1-2                            | 269 - 1,281               | 741 - 1,985       | 0.58          | 0.63                      | 0.65 ± 0.016                       | 0.59 ± 0.019                                   |
| 57 | Enzyme         | Gamma-secretase                                                  | 1,932               | 3.16                   | 1-2                            | 32 - 1,634                | 1,130 - 1,980     | 0.59          | 0.67                      | 0.62 ± 0.017                       | 0.63 ± 0.026                                   |
| 58 | Enzyme         | Anandamide amidohydrolase                                        | 3,242               | 2.72                   | 1-2                            | 254 - 1,871               | 1,339 - 2,005     | 0.59          | 0.86                      | 0.66 ± 0.025                       | 0.83 ± 0.014                                   |
| 59 | Enzyme         | Cyclooxygenase-2                                                 | 5,085               | 1.72                   | 1-2                            | 72 - 1,441                | 562 - 1,915       | 0.61          | 0.68                      | 0.68 ± 0.031                       | 0.64 ± 0.023                                   |
| 60 | Enzyme         | Monoamine oxidase B                                              | 4,283               | 1.62                   | 1-2                            | 73 - 1,996                | 721 - 2,043       | 0.63          | 0.66                      | 0.70 ± 0.023                       | 0.63 ± 0.019                                   |
| 61 | Enzyme         | Dihydrofolate reductase                                          | 2,309 <sup>b</sup>  | 1.74                   | 1-2                            | 103 - 1,721               | 1,035 - 1,998     | 0.71          | 0.57                      | 0.76 ± 0.017                       | 0.57 ± 0.018                                   |
| 62 | Ion channel    | HERG                                                             | 9,198               | 3.46                   | 1-2                            | 156 - 1,455               | 1,038 - 1,888     | 0.38          | 0.66                      | 0.42 ± 0.013                       | 0.62 ± 0.0087                                  |
| 63 | Ion channel    | Voltage-gated potassium channel subunit Kv1.5                    | 739                 | 3.27                   | 1-2                            | 94 - 430                  | 151 - 495         | 0.39          | 0.53                      | 0.42 ± 0.020                       | 0.50 ± 0.029                                   |
| 64 | Ion channel    | Sodium channel protein type IX alpha subunit                     | 5,677               | 3.13                   | 1-2                            | 125 - 1,331               | 887 - 1,907       | 0.42          | 0.72                      | 0.47 ± 0.016                       | 0.68 ± 0.020                                   |
| 65 | Ion channel    | Vanilloid receptor                                               | 2,856               | 2.56                   | 1-2                            | 45 - 1,898                | 342 - 1,728       | 0.46          | 0.78                      | 0.50 ± 0.017                       | 0.75 ± 0.016                                   |
| 66 | Ion channel    | Transient receptor potential cation channel subfamily M member 8 | 721                 | 2.74                   | 1-3                            | 160 - 510                 | 67 - 489          | 0.51          | 0.76                      | 0.58 ± 0.040                       | 0.73 ± 0.036                                   |
| 67 | Ion channel    | Apoptosis regulator Bcl-2                                        | 2,542               | 2.31                   | 1-2                            | 156 - 1,437               | 1,177 - 2,001     | 0.51          | 0.88                      | 0.55 ± 0.026                       | 0.86 ± 0.016                                   |
| 68 | Ion channel    | Neuronal acetylcholine receptor protein alpha-7 subunit          | 2,195               | 2.12                   | 1-2                            | 114 - 1,796               | 989 - 1,984       | 0.51          | 0.75                      | 0.57 ± 0.014                       | 0.72 ± 0.013                                   |
| 69 | Ion channel    | Transient receptor potential cation channel subfamily A member 1 | 621                 | 1.81                   | 1-2                            | 41 - 399                  | 269 - 467         | 0.56          | 0.68                      | 0.57 ± 0.031                       | 0.66 ± 0.035                                   |
| 70 | Ion channel    | P2X purinoceptor 7                                               | 2,247               | 1.79                   | 1-2                            | 68 - 664                  | 591 - 1,719       | 0.63          | 0.31                      | 0.65 ± 0.018                       | 0.30 ± 0.031                                   |
| 71 | Ion channel    | Neuronal acetylcholine receptor; alpha4/beta2                    | 2,625               | 1.56                   | 1-2                            | 36 - 1,926                | 690 - 2,000       | 0.83          | 0.51                      | 0.90 ± 0.047                       | 0.51 ± 0.025                                   |
| 72 | Kinase         | Nerve growth factor receptor Trk-A                               | 2,587               | 3.36                   | 1-2                            | 196 - 1,694               | 856 - 1,938       | 0.37          | 0.71                      | 0.42 ± 0.017                       | 0.67 ± 0.025                                   |
| 73 | Kinase         | Insulin-like growth factor I receptor                            | 3,019               | 3.76                   | 1-2                            | 98 - 1,731                | 495 - 1,642       | 0.40          | 0.85                      | 0.44 ± 0.010                       | 0.83 ± 0.0083                                  |
| 74 | Kinase         | Tyrosine-protein kinase JAK1                                     | 4,345               | 3.19                   | 1-2                            | 233 - 1,827               | 934 - 1,989       | 0.41          | 0.81                      | 0.45 ± 0.012                       | 0.78 ± 0.0093                                  |
| 75 | Kinase         | Serine/threonine-protein kinase mTOR                             | 4,414               | 3.60                   | 1-2                            | 420 - 1,710               | 652 - 1,838       | 0.41          | 0.81                      | 0.46 ± 0.018                       | 0.78 ± 0.022                                   |
| 76 | Kinase         | Tyrosine-protein kinase JAK2                                     | 5,933               | 3.29                   | 1-2                            | 158 - 1,676               | 1,132 - 1,963     | 0.42          | 0.80                      | 0.46 ± 0.010                       | 0.77 ± 0.0072                                  |
| 77 | Kinase         | Serine/threonine-protein kinase B-raf                            | 3,234               | 3.54                   | 1-2                            | 68 - 1,500                | 586 - 1,994       | 0.44          | 0.80                      | 0.48 ± 0.012                       | 0.77 ± 0.011                                   |
| 78 | Kinase         | Hepatocyte growth factor receptor                                | 3,276               | 3.66                   | 1-2                            | 126 - 2,011               | 687 - 1,954       | 0.44          | 0.80                      | 0.51 ± 0.032                       | 0.75 ± 0.037                                   |
| 79 | Kinase         | Tyrosine-protein kinase SYK                                      | 3,368               | 3.39                   | 1-2                            | 52 - 1,737                | 1,146 - 1,939     | 0.44          | 0.80                      | 0.49 ± 0.015                       | 0.78 ± 0.0057                                  |
| 80 | Kinase         | Fibroblast growth factor receptor 1                              | 2,473               | 3.31                   | 1-2                            | 87 - 1,726                | 572 - 1,909       | 0.45          | 0.83                      | 0.49 ± 0.024                       | 0.81 ± 0.017                                   |
| 81 | Kinase         | Serine/threonine-protein kinase PIM1                             | 4,022               | 2.93                   | 1-2                            | 193 - 1,494               | 1,144 - 1,996     | 0.45          | 0.88                      | 0.49 ± 0.012                       | 0.86 ± 0.0070                                  |
| 82 | Kinase         | Fibroblast growth factor receptor 3                              | 1,408               | 3.04                   | 1-2                            | 153 - 2,000               | 519 - 1,916       | 0.46          | 0.59                      | 0.51 ± 0.021                       | 0.55 ± 0.035                                   |
| 83 | Kinase         | Tyrosine-protein kinase SRC                                      | 4,183               | 3.39                   | 1-2                            | 89 - 2,031                | 550 - 1,975       | 0.47          | 0.83                      | 0.53 ± 0.023                       | 0.79 ± 0.019                                   |
| 84 | Kinase         | Tyrosine-protein kinase receptor FLT3                            | 2,274               | 3.50                   | 1-2                            | 101 - 1,617               | 833 - 1,988       | 0.48          | 0.74                      | 0.53 ± 0.023                       | 0.70 ± 0.019                                   |
| 85 | Kinase         | Epidermal growth factor receptor erbB1                           | 7,122               | 3.24                   | 1-2                            | 159 - 1,878               | 791 - 1,957       | 0.48          | 0.80                      | 0.55 ± 0.016                       | 0.77 ± 0.011                                   |
| 86 | Kinase         | Serine/threonine-protein kinase AKT                              | 3,114               | 3.59                   | 1-2                            | 97 - 1,912                | 824 - 1,887       | 0.48          | 0.77                      | 0.53 ± 0.022                       | 0.74 ± 0.022                                   |
| 87 | Kinase         | MAP kinase p38 alpha                                             | 4,518               | 3.37                   | 1-2                            | 91 - 2,034                | 463 - 1,837       | 0.48          | 0.73                      | 0.54 ± 0.017                       | 0.69 ± 0.010                                   |

|     |                  |                                                  |       |      |     |             |               |      |      |               |               |
|-----|------------------|--------------------------------------------------|-------|------|-----|-------------|---------------|------|------|---------------|---------------|
| 88  | Kinase           | Serine/threonine-protein kinase PIM2             | 2,406 | 2.93 | 1-2 | 171 - 1,790 | 590 - 1,910   | 0.48 | 0.72 | 0.54 ± 0.025  | 0.68 ± 0.026  |
| 89  | Kinase           | Tyrosine-protein kinase JAK3                     | 3,225 | 3.15 | 1-2 | 227 - 1,430 | 781 - 1,926   | 0.49 | 0.77 | 0.54 ± 0.018  | 0.75 ± 0.023  |
| 90  | Kinase           | Vascular endothelial growth factor receptor 2    | 8,936 | 3.40 | 1-2 | 133 - 2,044 | 1,275 - 1,998 | 0.49 | 0.69 | 0.55 ± 0.012  | 0.65 ± 0.015  |
| 91  | Kinase           | MAP kinase ERK2                                  | 3,712 | 3.28 | 1-2 | 589 - 1,566 | 920 - 1,947   | 0.50 | 0.80 | 0.56 ± 0.013  | 0.78 ± 0.0055 |
| 92  | Kinase           | Cyclin-dependent kinase 2                        | 2,352 | 2.87 | 1-2 | 74 - 1,508  | 1,025 - 1,893 | 0.51 | 0.74 | 0.56 ± 0.019  | 0.71 ± 0.018  |
| 93  | Kinase           | Serine/threonine-protein kinase Aurora-A         | 2,949 | 3.39 | 1-2 | 486 - 1,687 | 668 - 2,009   | 0.56 | 0.75 | 0.62 ± 0.024  | 0.72 ± 0.015  |
| 94  | Kinase           | Tyrosine-protein kinase ABL                      | 2,249 | 3.17 | 1-3 | 201 - 1,741 | 522 - 2,047   | 0.56 | 0.83 | 0.63 ± 0.044  | 0.79 ± 0.029  |
| 95  | Kinase           | Glycogen synthase kinase-3 beta                  | 2,702 | 2.76 | 1-2 | 64 - 1,715  | 894 - 1,802   | 0.61 | 0.58 | 0.67 ± 0.022  | 0.55 ± 0.023  |
| 96  | Nuclear receptor | Thyroid hormone receptor alpha                   | 461   | 1.56 | 1-2 | 109 - 441   | 277 - 508     | 0.38 | 0.82 | 0.40 ± 0.014  | 0.82 ± 0.0078 |
| 97  | Nuclear receptor | Glucocorticoid receptor                          | 2,293 | 3.26 | 1-2 | 273 - 1,982 | 728 - 2,034   | 0.48 | 0.78 | 0.53 ± 0.026  | 0.74 ± 0.021  |
| 98  | Nuclear receptor | Peroxisome proliferator-activated receptor gamma | 3,018 | 3.32 | 1-2 | 192 - 1,412 | 951 - 2,015   | 0.51 | 0.72 | 0.55 ± 0.015  | 0.69 ± 0.010  |
| 99  | Nuclear receptor | Vitamin D receptor                               | 546   | 1.91 | 1-2 | 39 - 366    | 234 - 464     | 0.51 | 0.88 | 0.54 ± 0.030  | 0.87 ± 0.0095 |
| 100 | Nuclear receptor | Androgen Receptor                                | 2,597 | 1.68 | 1-2 | 193 - 1,865 | 1,295 - 1,942 | 0.56 | 0.72 | 0.60 ± 0.024  | 0.70 ± 0.019  |
| 101 | Nuclear receptor | Estrogen receptor alpha                          | 2,878 | 2.83 | 1-2 | 61 - 1,188  | 746 - 1,494   | 0.57 | 0.76 | 0.62 ± 0.012  | 0.74 ± 0.0043 |
| 102 | Nuclear receptor | Estrogen receptor beta                           | 2,229 | 2.59 | 1-2 | 358 - 1,503 | 584 - 1,666   | 0.67 | 0.68 | 0.72 ± 0.023  | 0.65 ± 0.023  |
| 103 | Protease         | Cathepsin D                                      | 2,568 | 3.29 | 1-2 | 59 - 1,946  | 952 - 1,968   | 0.39 | 0.85 | 0.42 ± 0.018  | 0.83 ± 0.0056 |
| 104 | Protease         | Matrix metalloproteinase-1                       | 3,746 | 2.49 | 1-2 | 79 - 2,043  | 915 - 1,868   | 0.42 | 0.81 | 0.47 ± 0.020  | 0.78 ± 0.015  |
| 105 | Protease         | ADAM17                                           | 2,410 | 3.15 | 1-2 | 151 - 1,434 | 703 - 1,976   | 0.42 | 0.89 | 0.47 ± 0.022  | 0.87 ± 0.0084 |
| 106 | Protease         | Cathepsin S                                      | 2,309 | 3.44 | 1-2 | 104 - 1,386 | 1,152 - 2,025 | 0.46 | 0.79 | 0.50 ± 0.010  | 0.76 ± 0.013  |
| 107 | Protease         | Thrombin                                         | 6,703 | 3.50 | 1-2 | 220 - 1,779 | 1,399 - 1,894 | 0.49 | 0.84 | 0.56 ± 0.023  | 0.81 ± 0.014  |
| 108 | Protease         | Beta-secretase 1                                 | 7,554 | 3.17 | 1-2 | 295 - 1,934 | 737 - 1,971   | 0.50 | 0.74 | 0.57 ± 0.028  | 0.69 ± 0.025  |
| 109 | Protease         | Dipeptidyl peptidase IV                          | 4,517 | 2.36 | 1-2 | 108 - 1,793 | 762 - 2,015   | 0.53 | 0.77 | 0.58 ± 0.010  | 0.74 ± 0.0082 |
| 110 | Protease         | Matrix metalloproteinase 13                      | 2,844 | 2.83 | 1-2 | 161 - 976   | 746 - 1,820   | 0.54 | 0.74 | 0.59 ± 0.010  | 0.72 ± 0.0079 |
| 111 | Protease         | Trypsin I                                        | 2,501 | 3.34 | 1-2 | 202 - 1,979 | 630 - 1,934   | 0.57 | 0.91 | 0.63 ± 0.050  | 0.89 ± 0.018  |
| 112 | Protease         | Leukocyte elastase                               | 2,808 | 2.64 | 1-2 | 239 - 1,702 | 923 - 1,984   | 0.57 | 0.93 | 0.63 ± 0.038  | 0.92 ± 0.017  |
| 113 | Protease         | Matrix metalloproteinase-2                       | 4,085 | 2.76 | 1-2 | 133 - 1,732 | 434 - 2,039   | 0.58 | 0.81 | 0.60 ± 0.027  | 0.79 ± 0.020  |
| 114 | Protease         | Renin                                            | 3,010 | 3.64 | 1-2 | 82 - 1,840  | 536 - 1,916   | 0.58 | 0.74 | 0.62 ± 0.013  | 0.72 ± 0.010  |
| 115 | Protease         | Matrix metalloproteinase 9                       | 3,149 | 2.65 | 1-2 | 240 - 1,503 | 210 - 1,824   | 0.59 | 0.70 | 0.65 ± 0.017  | 0.67 ± 0.010  |
| 116 | Protease         | Coagulation factor X                             | 6,307 | 3.49 | 1-2 | 310 - 1,191 | 535 - 1,952   | 0.64 | 0.80 | 0.70 ± 0.023  | 0.77 ± 0.0079 |
| 117 | Protease         | Human immunodeficiency virus type 1 protease     | 4,571 | 3.65 | 1-2 | 147 - 1,032 | 901 - 1,997   | 0.94 | 0.65 | 1.04 ± 0.029  | 0.63 ± 0.018  |
| 118 | Transporter      | Potassium-transporting ATPase                    | 532   | 1.58 | 1-2 | 207 - 501   | 221 - 496     | 0.40 | 0.52 | 0.42 ± 0.0081 | 0.53 ± 0.018  |
| 119 | Transporter      | GABA transporter 1                               | 576   | 2.76 | 1-2 | 22 - 334    | 179 - 509     | 0.44 | 0.86 | 0.47 ± 0.040  | 0.84 ± 0.025  |
| 120 | Transporter      | Dopamine transporter                             | 5,908 | 2.20 | 1-2 | 318 - 1,930 | 691 - 2,033   | 0.48 | 0.76 | 0.54 ± 0.014  | 0.72 ± 0.017  |
| 121 | Transporter      | Norepinephrine transporter                       | 4,342 | 1.91 | 1-2 | 166 - 1,713 | 1,048 - 1,954 | 0.50 | 0.70 | 0.55 ± 0.015  | 0.66 ± 0.018  |
| 122 | Transporter      | Serotonin transporter                            | 7,886 | 2.73 | 1-2 | 178 - 1,129 | 677 - 1,806   | 0.51 | 0.75 | 0.56 ± 0.011  | 0.72 ± 0.0094 |
| 123 | Others           | Histone deacetylase 1                            | 4,239 | 2.49 | 1-2 | 198 - 2,022 | 1,533 - 2,008 | 0.41 | 0.74 | 0.47 ± 0.015  | 0.71 ± 0.017  |
| 124 | Others           | Bromodomain-containing protein 4                 | 2,208 | 2.87 | 1-2 | 424 - 1,484 | 477 - 1,470   | 0.41 | 0.82 | 0.46 ± 0.032  | 0.79 ± 0.026  |
| 125 | Others           | Histone deacetylase 6                            | 2,725 | 1.97 | 1-2 | 119 - 1,920 | 605 - 1,926   | 0.42 | 0.82 | 0.47 ± 0.023  | 0.79 ± 0.015  |
| 126 | Others           | p53-binding protein Mdm-2                        | 2,346 | 3.51 | 1-2 | 33 - 1,936  | 1,277 - 1,950 | 0.42 | 0.88 | 0.47 ± 0.020  | 0.86 ± 0.011  |
| 127 | Others           | Sigma opioid receptor                            | 3,094 | 2.53 | 1-2 | 48 - 1,366  | 502 - 1,814   | 0.53 | 0.56 | 0.58 ± 0.021  | 0.54 ± 0.019  |

a: Target names extracted from ChEMBL (release 25).

b: Data with the standard relation of "=" and  $pIC_{50} \geq 0$  were included in the present study.

c: MAE±standard deviation.

d:  $R^2$ ±standard deviation.

Table S4. Average RMSE values for 25 targets

| Target <sup>a</sup>                      | CNN <sup>b</sup> | RF <sup>b,c</sup> | FNN <sup>b,c</sup> | GCN <sup>d</sup> :<br>KekuleScope dataset | GCN <sup>d</sup> :<br>present dataset |
|------------------------------------------|------------------|-------------------|--------------------|-------------------------------------------|---------------------------------------|
| Acetylcholinesterase                     | 0.77             | 0.71              | 0.72               | 0.78                                      | 0.45                                  |
| Alpha-2a adrenergic receptor             | 0.78             | 0.72              | 0.80               | 0.70                                      | N.D.                                  |
| Androgen Receptor                        | 0.69             | 0.59              | 0.64               | 0.66                                      | 0.48                                  |
| Cannabinoid CB1 receptor                 | 0.79             | 0.71              | 0.74               | 0.74                                      | 0.37                                  |
| Carbonic anhydrase II                    | 0.69             | 0.60              | 0.61               | 0.58                                      | 0.57                                  |
| Caspase 3                                | 0.64             | 0.54              | 0.59               | 0.63                                      | N.D.                                  |
| Cyclooxygenase-1                         | 0.74             | 0.66              | 0.72               | 0.73                                      | 0.45                                  |
| Cyclooxygenase-2                         | 0.82             | 0.77              | 0.80               | 0.75                                      | 0.64                                  |
| Dihydrofolate reductase                  | 0.79             | 0.73              | 0.77               | 0.98                                      | 0.68                                  |
| Dopamine D2 receptor                     | 0.78             | 0.71              | 0.72               | 0.87                                      | 0.38                                  |
| Epidermal growth factor receptor erbB1   | 0.77             | 0.69              | 0.73               | 0.73                                      | 0.54                                  |
| Estrogen receptor alpha                  | 0.72             | 0.65              | 0.67               | 0.74                                      | 0.56                                  |
| Glucocorticoid receptor                  | 0.63             | 0.59              | 0.62               | 0.67                                      | 0.50                                  |
| Glycogen synthase kinase-3 beta          | 0.83             | 0.70              | 0.78               | 0.78                                      | 0.50                                  |
| HERG                                     | 0.61             | 0.59              | 0.61               | 0.61                                      | 0.34                                  |
| Tyrosine-protein kinase LCK              | 0.87             | 0.79              | 0.84               | 0.87                                      | N.D.                                  |
| Monoamine oxidase A                      | 0.71             | 0.63              | 0.68               | 0.70                                      | 0.59                                  |
| Mu opioid receptor                       | 0.80             | 0.67              | 0.70               | 0.64                                      | 0.54                                  |
| Norepinephrine transporter               | 0.75             | 0.68              | 0.69               | 0.69                                      | 0.40                                  |
| Serine/threonine-protein kinase Aurora-A | 0.84             | 0.74              | 0.80               | 0.78                                      | 0.67                                  |
| Serine/threonine-protein kinase B-raf    | 0.65             | 0.58              | 0.59               | 0.70                                      | 0.32                                  |
| Thrombin                                 | 0.91             | 0.79              | 0.83               | 0.85                                      | 0.43                                  |
| Tyrosine-protein kinase ABL              | 0.86             | 0.76              | 0.80               | 0.82                                      | 0.54                                  |
| Tyrosine-protein kinase JAK2             | 0.72             | 0.62              | 0.67               | 0.69                                      | 0.50                                  |
| Vanilloid receptor                       | 0.74             | 0.70              | 0.72               | 0.72                                      | 0.33                                  |
| Mean RMSE                                | 0.76             | 0.68              | 0.71               | 0.74                                      | 0.49                                  |
| Standard deviation                       | 0.078            | 0.070             | 0.076              | 0.091                                     | 0.11                                  |

a: Target names extracted from ChEMBL (release 25).

b: The average of the RMSE values reported by the authors of KekuleScope.

c: The result of the models trained on Morgan fingerprints of 2048 bits.

d: The average of the RMSE values obtained from the individual models.

N.D.: Not determined



Table S5. Performance comparison of ensemble models on SET1-3

| Protein family   | Target <sup>a</sup>                                              | Number of compounds | SET1          |                           | SET2          |                           | SET3          |                           | SET1-3 <sup>b</sup> |                           |
|------------------|------------------------------------------------------------------|---------------------|---------------|---------------------------|---------------|---------------------------|---------------|---------------------------|---------------------|---------------------------|
|                  |                                                                  |                     | MAE: ensemble | R <sup>2</sup> : ensemble | MAE: ensemble | R <sup>2</sup> : ensemble | MAE: ensemble | R <sup>2</sup> : ensemble | MAE: ensemble       | R <sup>2</sup> : ensemble |
| GPCR             | Gonadotropin-releasing hormone receptor                          | 1,726               | 0.62          | 0.94                      | 0.60          | 0.95                      | 0.64          | 0.94                      | 0.62 ± 0.018        | 0.94 ± 0.0050             |
| GPCR             | Muscarinic acetylcholine receptor M2                             | 2,135               | 0.62          | 0.83                      | 0.60          | 0.84                      | 0.59          | 0.84                      | 0.60 ± 0.012        | 0.84 ± 0.0056             |
| GPCR             | Mu opioid receptor                                               | 8,904               | 0.58          | 0.73                      | 0.56          | 0.74                      | 0.57          | 0.74                      | 0.57 ± 0.010        | 0.74 ± 0.0088             |
| GPCR             | Dopamine D2 receptor                                             | 11,632              | 0.50          | 0.67                      | 0.50          | 0.66                      | 0.50          | 0.67                      | 0.50 ± 0.0033       | 0.66 ± 0.0035             |
| Enzyme           | Gamma-secretase                                                  | 1,932               | 0.59          | 0.67                      | 0.57          | 0.68                      | 0.58          | 0.67                      | 0.58 ± 0.010        | 0.67 ± 0.010              |
| Enzyme           | Cytochrome P450 19A1                                             | 2,196               | 0.54          | 0.73                      | 0.54          | 0.73                      | 0.50          | 0.77                      | 0.53 ± 0.022        | 0.74 ± 0.021              |
| Enzyme           | Carbonic anhydrase II                                            | 5,808               | 0.53          | 0.76                      | 0.51          | 0.76                      | 0.52          | 0.76                      | 0.52 ± 0.012        | 0.76 ± 0.0030             |
| Enzyme           | Acetylcholinesterase                                             | 9,737               | 0.51          | 0.71                      | 0.50          | 0.72                      | 0.50          | 0.71                      | 0.50 ± 0.0058       | 0.72 ± 0.0035             |
| Ion channel      | Transient receptor potential cation channel subfamily A member 1 | 621                 | 0.56          | 0.68                      | 0.54          | 0.71                      | 0.57          | 0.67                      | 0.56 ± 0.015        | 0.68 ± 0.018              |
| Ion channel      | Voltage-gated potassium channel subunit Kv1.5                    | 739                 | 0.39          | 0.53                      | 0.37          | 0.58                      | 0.41          | 0.53                      | 0.39 ± 0.020        | 0.55 ± 0.029              |
| Ion channel      | Sodium channel protein type IX alpha subunit                     | 5,677               | 0.42          | 0.72                      | 0.42          | 0.72                      | 0.42          | 0.71                      | 0.42 ± 0.0028       | 0.72 ± 0.0050             |
| Ion channel      | HERG                                                             | 9,198               | 0.38          | 0.66                      | 0.37          | 0.67                      | 0.37          | 0.68                      | 0.37 ± 0.0035       | 0.67 ± 0.0089             |
| Kinase           | Fibroblast growth factor receptor 3                              | 1,408               | 0.46          | 0.59                      | 0.45          | 0.62                      | 0.46          | 0.61                      | 0.46 ± 0.0049       | 0.61 ± 0.013              |
| Kinase           | Tyrosine-protein kinase ABL                                      | 2,249               | 0.56          | 0.83                      | 0.56          | 0.83                      | 0.57          | 0.83                      | 0.56 ± 0.0077       | 0.83 ± 0.0025             |
| Kinase           | Epidermal growth factor receptor erbB1                           | 7,122               | 0.48          | 0.80                      | 0.48          | 0.80                      | 0.48          | 0.80                      | 0.48 ± 0.0031       | 0.80 ± 0.0023             |
| Kinase           | Vascular endothelial growth factor receptor 2                    | 8,933               | 0.49          | 0.69                      | 0.49          | 0.69                      | 0.49          | 0.70                      | 0.49 ± 0.0033       | 0.70 ± 0.0082             |
| Nuclear receptor | Thyroid hormone receptor alpha                                   | 461                 | 0.38          | 0.82                      | 0.44          | 0.76                      | 0.38          | 0.80                      | 0.40 ± 0.036        | 0.79 ± 0.031              |
| Nuclear receptor | Vitamin D receptor                                               | 546                 | 0.51          | 0.88                      | 0.44          | 0.90                      | 0.48          | 0.90                      | 0.48 ± 0.032        | 0.89 ± 0.012              |
| Nuclear receptor | Estrogen receptor alpha                                          | 2,878               | 0.57          | 0.76                      | 0.58          | 0.76                      | 0.58          | 0.76                      | 0.58 ± 0.0069       | 0.76 ± 0.0017             |
| Nuclear receptor | Peroxisome proliferator-activated receptor gamma                 | 3,018               | 0.51          | 0.72                      | 0.50          | 0.72                      | 0.51          | 0.70                      | 0.50 ± 0.0057       | 0.71 ± 0.0086             |
| Protease         | Cathepsin S                                                      | 2,309               | 0.46          | 0.79                      | 0.44          | 0.80                      | 0.45          | 0.80                      | 0.45 ± 0.010        | 0.80 ± 0.0064             |
| Protease         | ADAM17                                                           | 2,410               | 0.42          | 0.89                      | 0.43          | 0.89                      | 0.44          | 0.88                      | 0.43 ± 0.013        | 0.89 ± 0.0058             |
| Protease         | Thrombin                                                         | 6,703               | 0.49          | 0.84                      | 0.46          | 0.85                      | 0.49          | 0.84                      | 0.48 ± 0.014        | 0.85 ± 0.0080             |
| Protease         | Beta-secretase 1                                                 | 7,554               | 0.50          | 0.74                      | 0.51          | 0.74                      | 0.51          | 0.74                      | 0.51 ± 0.0062       | 0.74 ± 0.0030             |
| Transporter      | Potassium-transporting ATPase                                    | 532                 | 0.40          | 0.52                      | 0.38          | 0.53                      | 0.41          | 0.52                      | 0.40 ± 0.016        | 0.53 ± 0.0076             |
| Transporter      | GABA transporter 1                                               | 576                 | 0.44          | 0.86                      | 0.39          | 0.88                      | 0.45          | 0.83                      | 0.43 ± 0.031        | 0.86 ± 0.023              |
| Transporter      | Dopamine transporter                                             | 5,908               | 0.48          | 0.76                      | 0.47          | 0.76                      | 0.47          | 0.77                      | 0.48 ± 0.0083       | 0.76 ± 0.0056             |
| Transporter      | Serotonin transporter                                            | 7,886               | 0.51          | 0.75                      | 0.49          | 0.76                      | 0.50          | 0.76                      | 0.50 ± 0.0084       | 0.76 ± 0.0054             |
| Others           | Bromodomain-containing protein 4                                 | 2,208               | 0.41          | 0.82                      | 0.44          | 0.79                      | 0.43          | 0.81                      | 0.43 ± 0.011        | 0.81 ± 0.012              |
| Others           | p53-binding protein Mdm-2                                        | 2,346               | 0.42          | 0.88                      | 0.42          | 0.88                      | 0.45          | 0.87                      | 0.43 ± 0.014        | 0.88 ± 0.0059             |
| Others           | Sigma opioid receptor                                            | 3,094               | 0.53          | 0.56                      | 0.53          | 0.53                      | 0.53          | 0.55                      | 0.53 ± 0.0015       | 0.55 ± 0.016              |
| Others           | Histone deacetylase 1                                            | 4,239               | 0.41          | 0.74                      | 0.41          | 0.75                      | 0.42          | 0.74                      | 0.41 ± 0.0024       | 0.74 ± 0.0045             |

a: Target names extracted from ChEMBL (release 25).

b: The average and standard deviation of the MAE values for SET1-3.
